# Supplementary material for: RppH can faithfully replace TAP to allow cloning of 5′-triphosphate carrying small RNAs
Source: PubMed Central journal article supplement (PMC6369235; doi:10.1016/j.mex.2019.01.009), 2019-01-29

# Supplementary figure 1

## Rpph-Replicate1

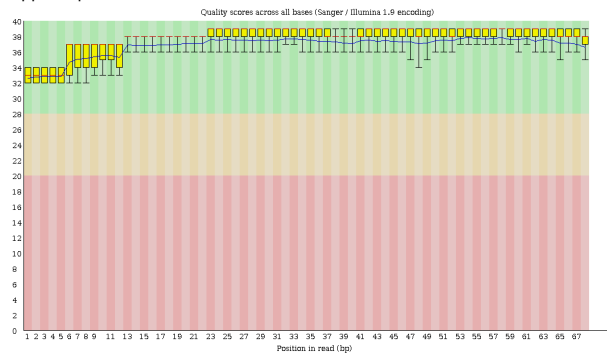

## TAP-Replicate1

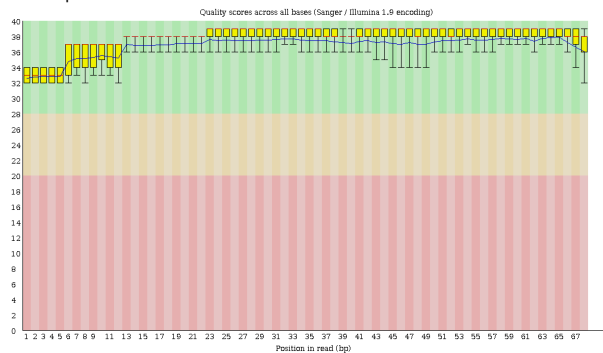

## Rpph-Replicate2

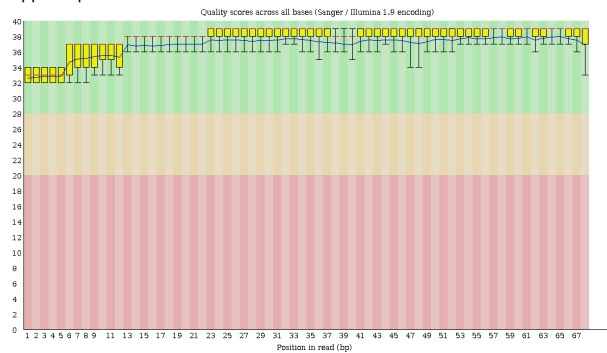

## TAP-Replicate2

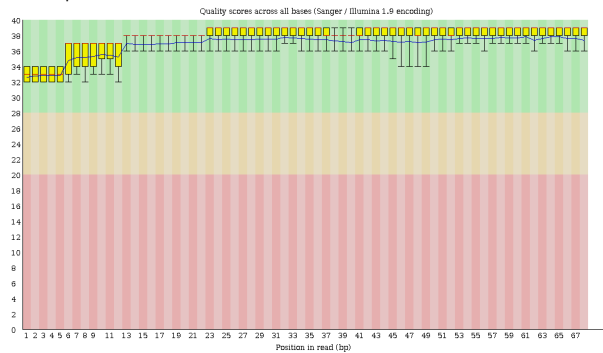

## Rpph-Replicate3

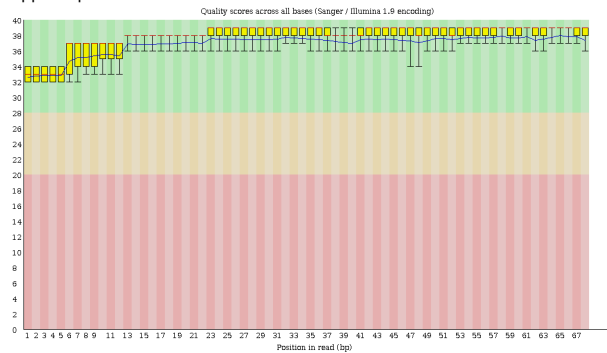

## TAP-Replicate3

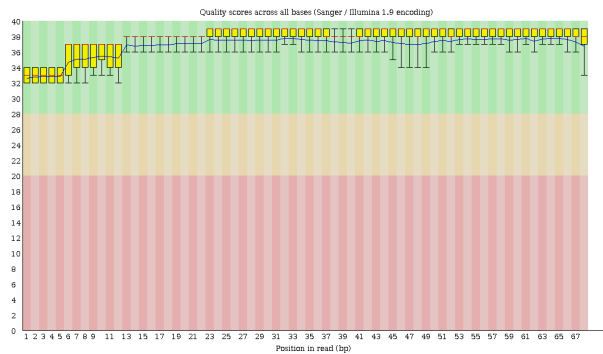

Supplementary figure 2

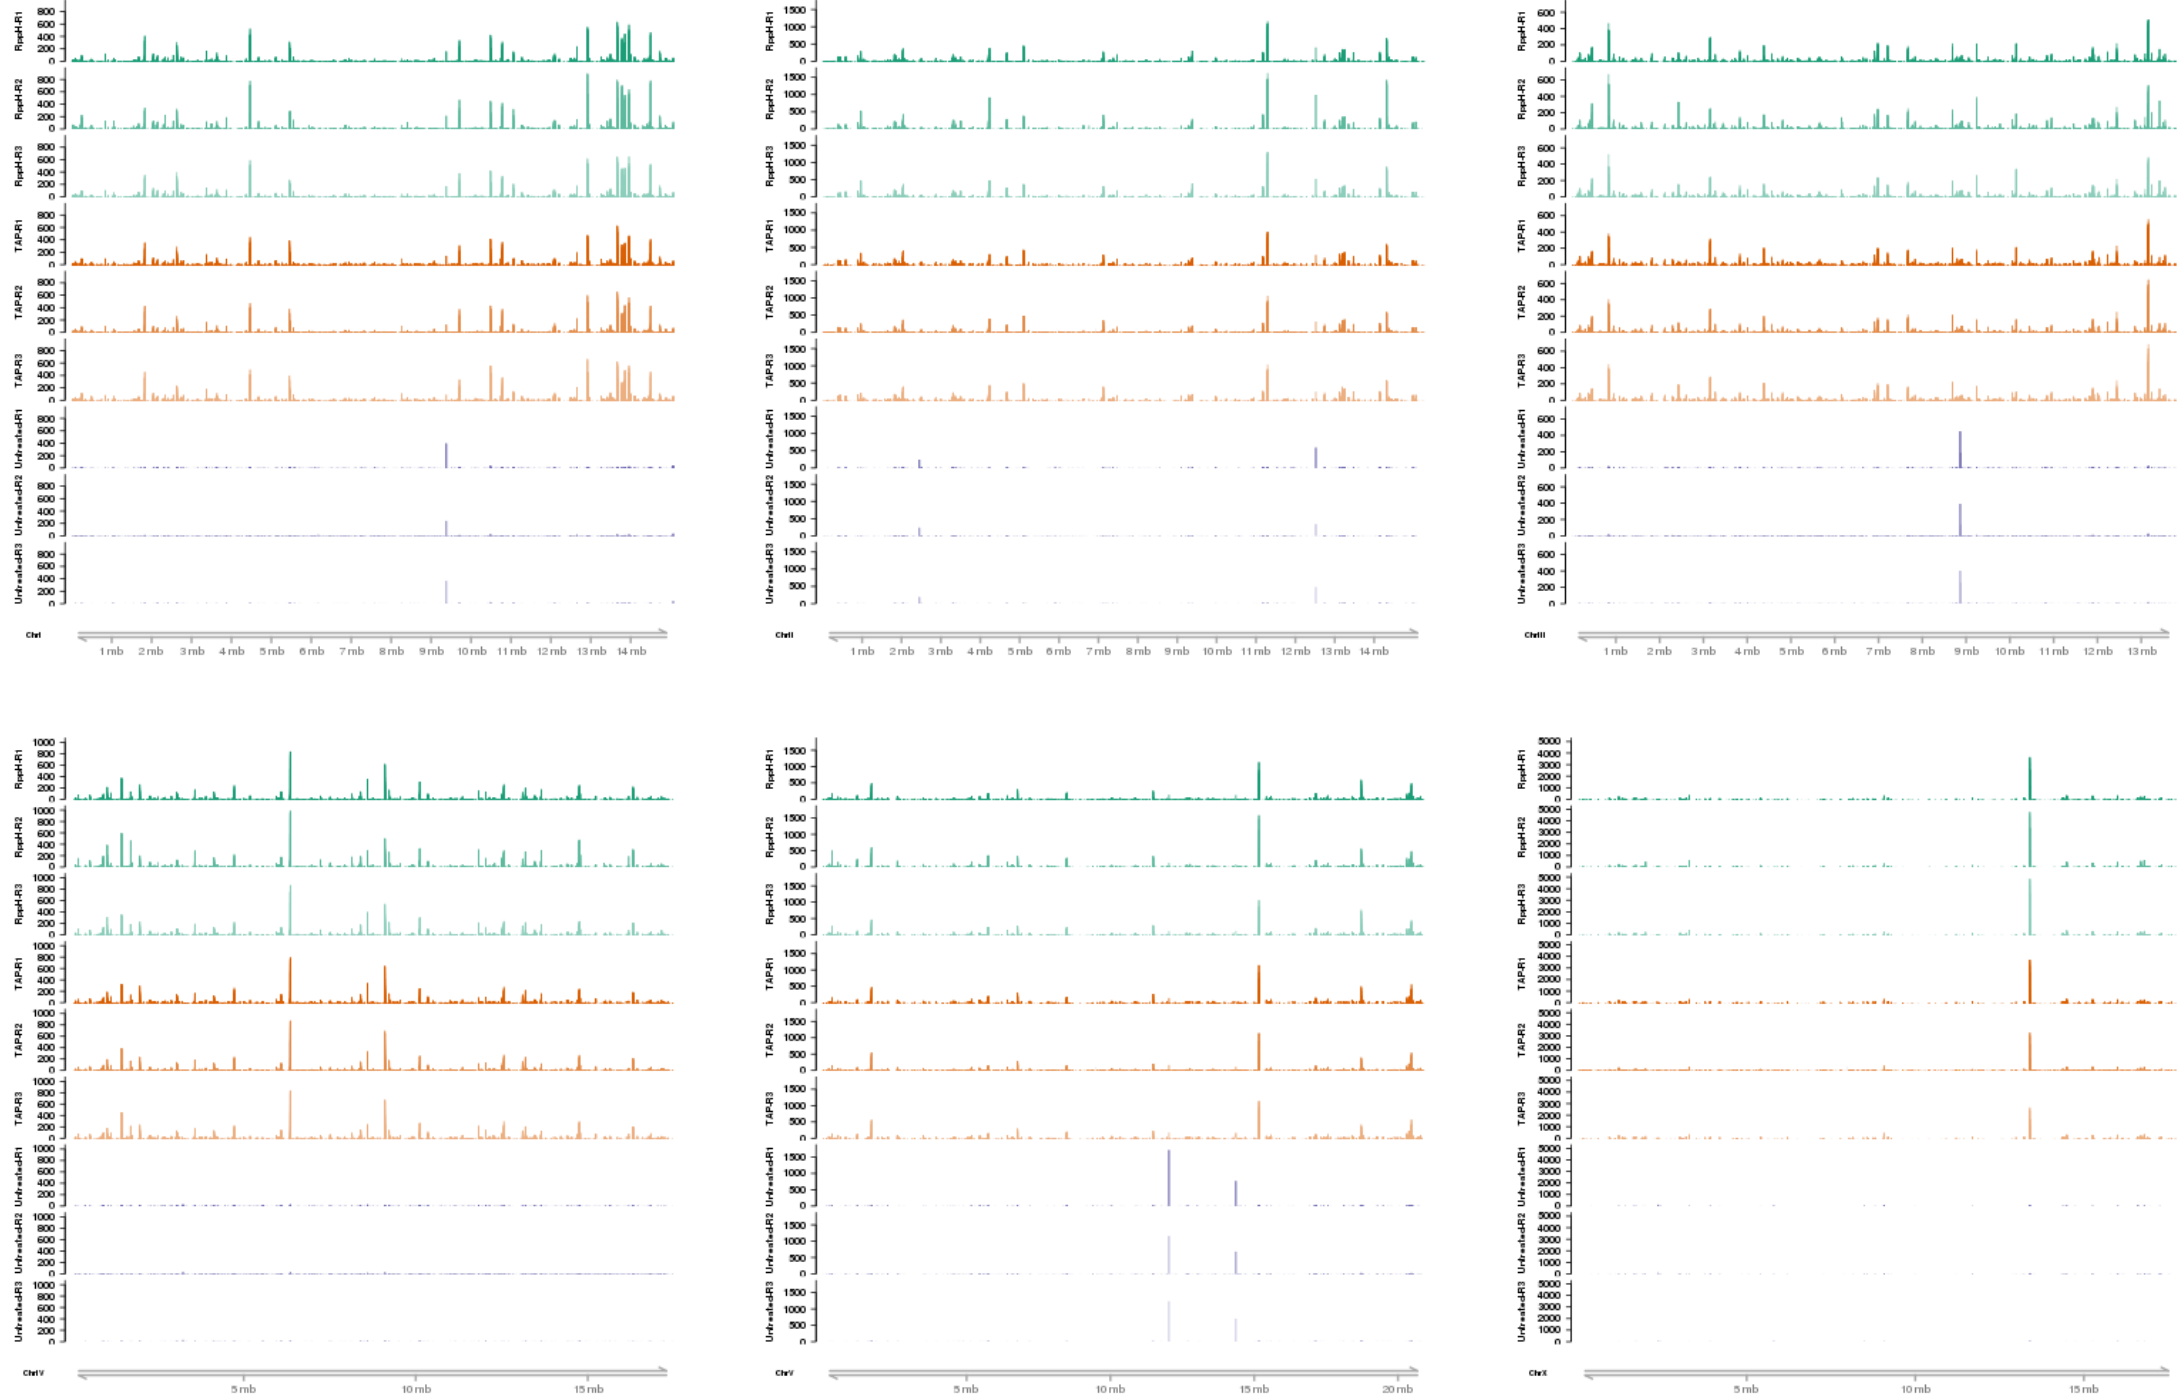

A

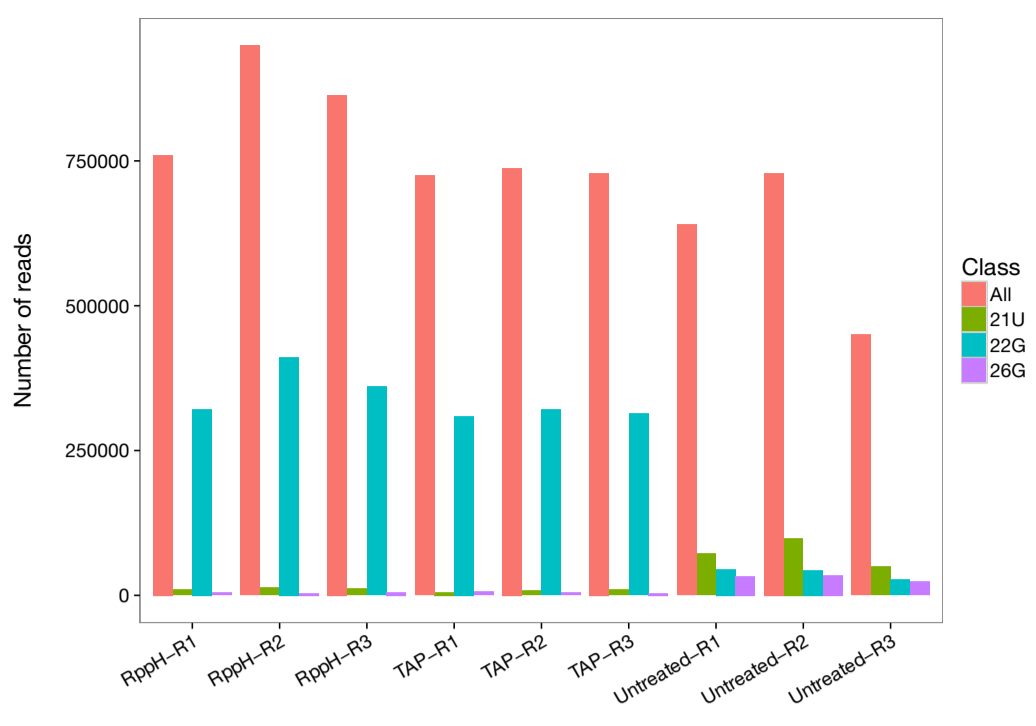

B

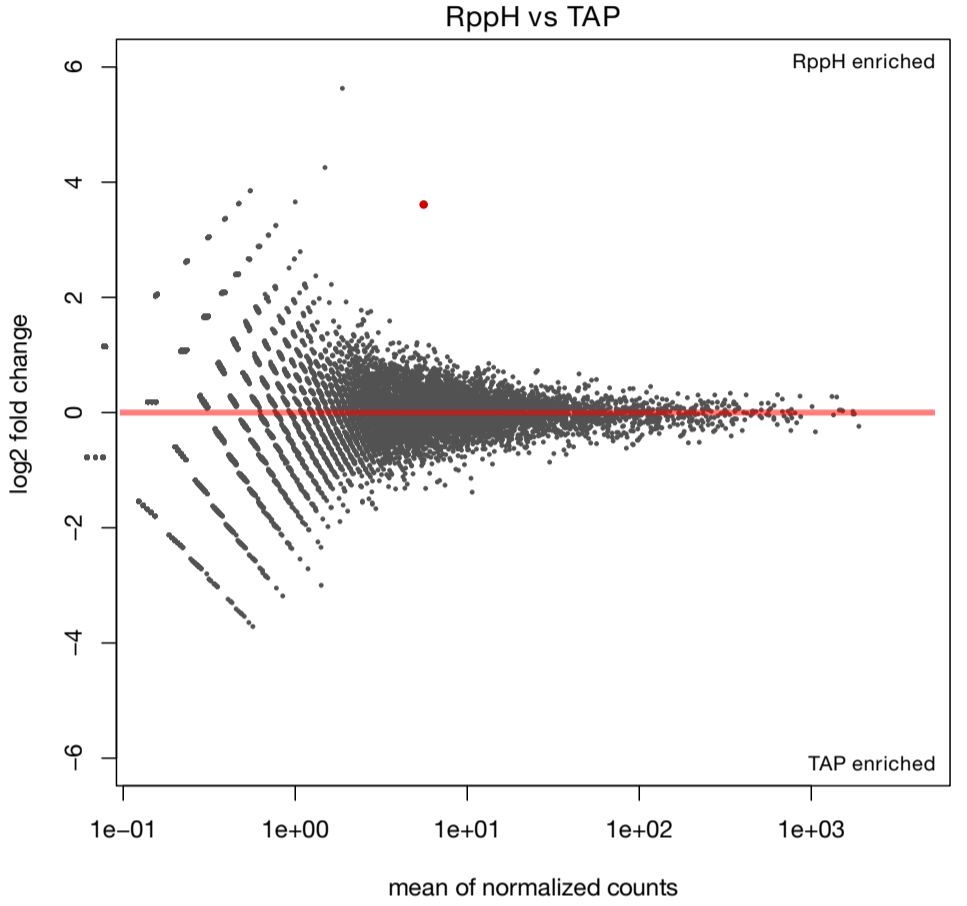

C

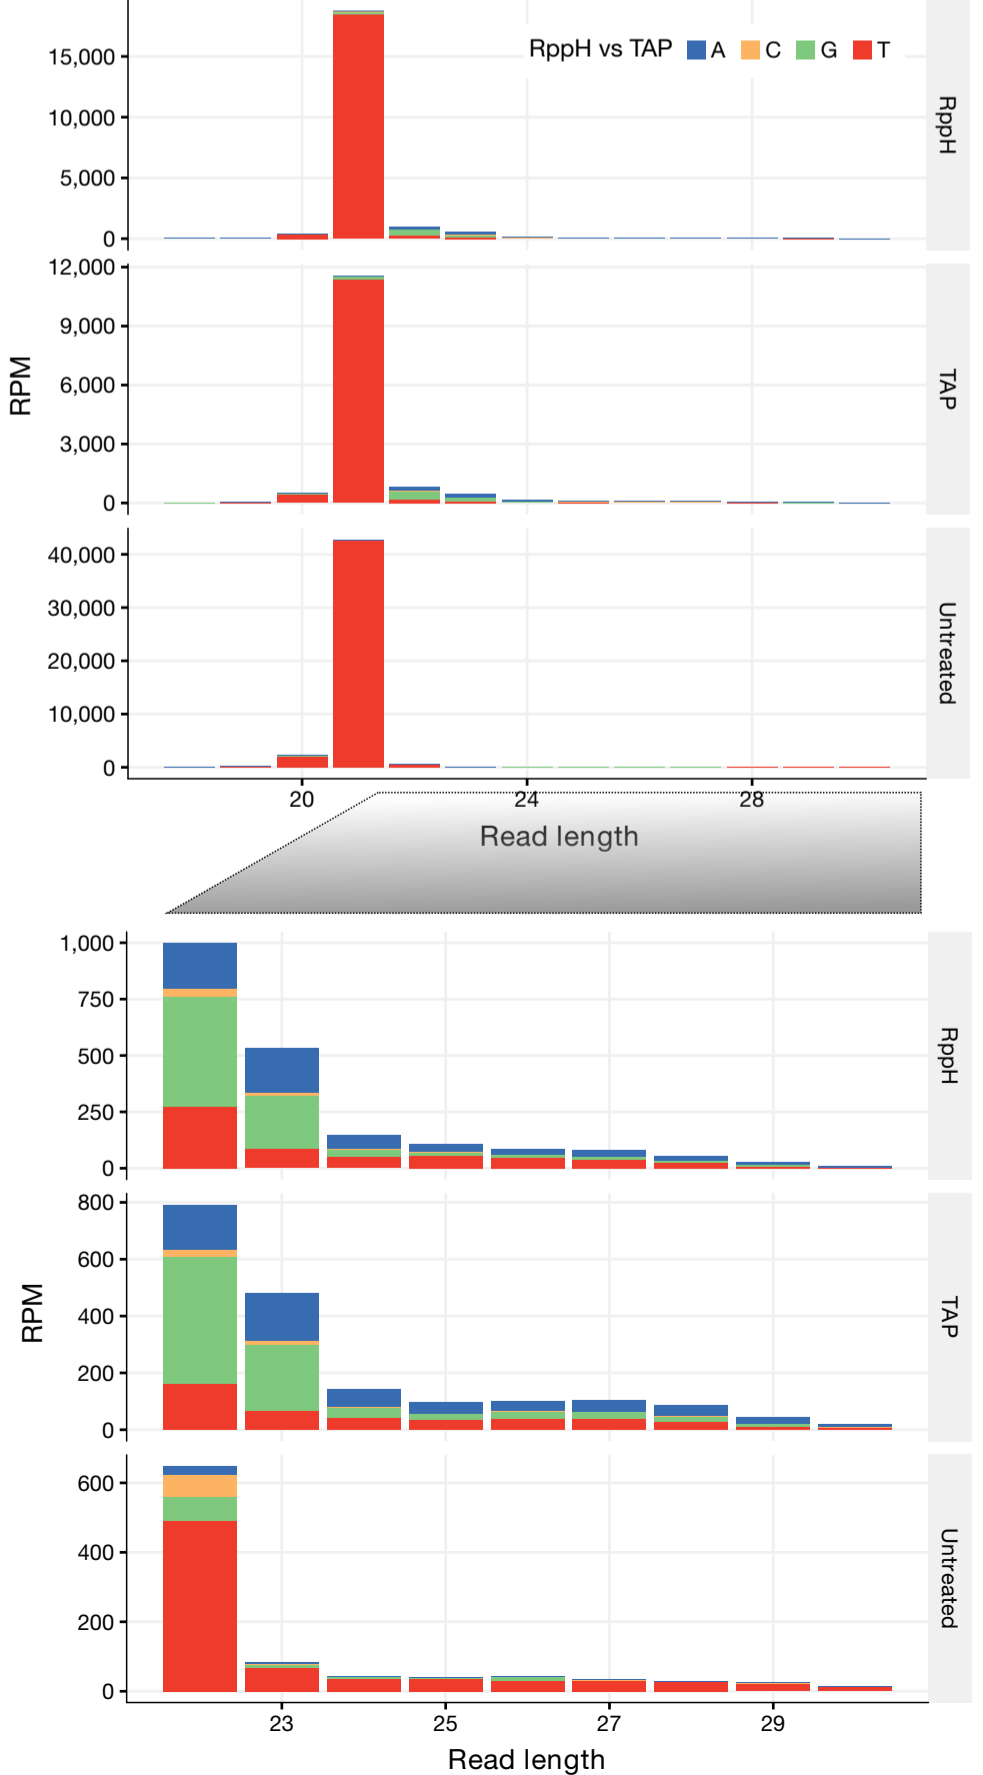

Supplement: mmc1.pdf [file mmc1.pdf]
